# Supplementary material
Source: PubMed Central journal article supplement (PMC4069616)
Supplement: supp_msu129_Supplemental_File_3_Supplemental_Figures.pdf [file supp_msu129_Supplemental_File_3_Supplemental_Figures.pdf]

number of gains correlates with number of sites

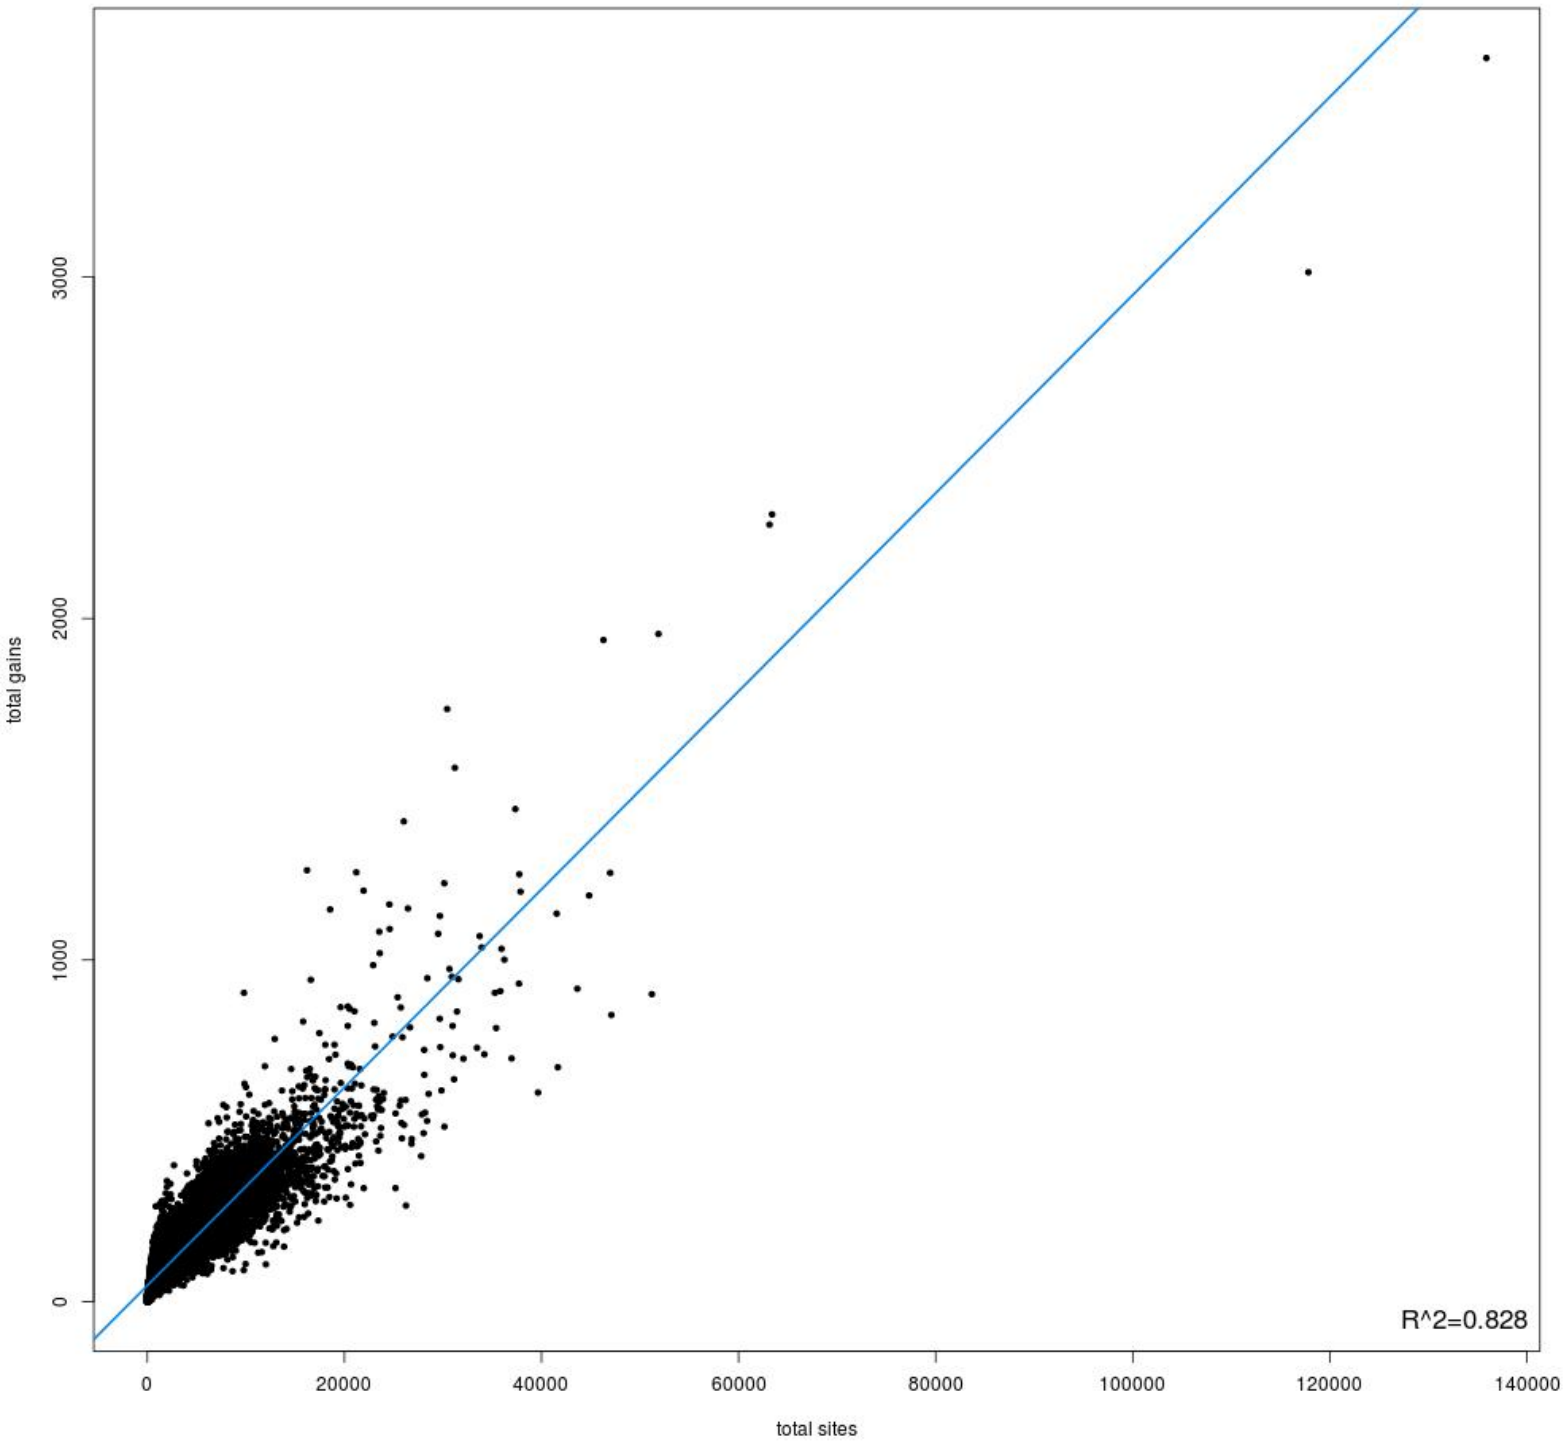

Supplemental Figure 1A: Inferred gain rates correlate with total number of binding sites

8mers that occur frequently have a higher likelihood that one or more 8mers will have a gain event occur. It is therefore necessary to normalize turnover rates by dividing the number of inferred gains by number of total observed sites

number of losses correlates with number of sites

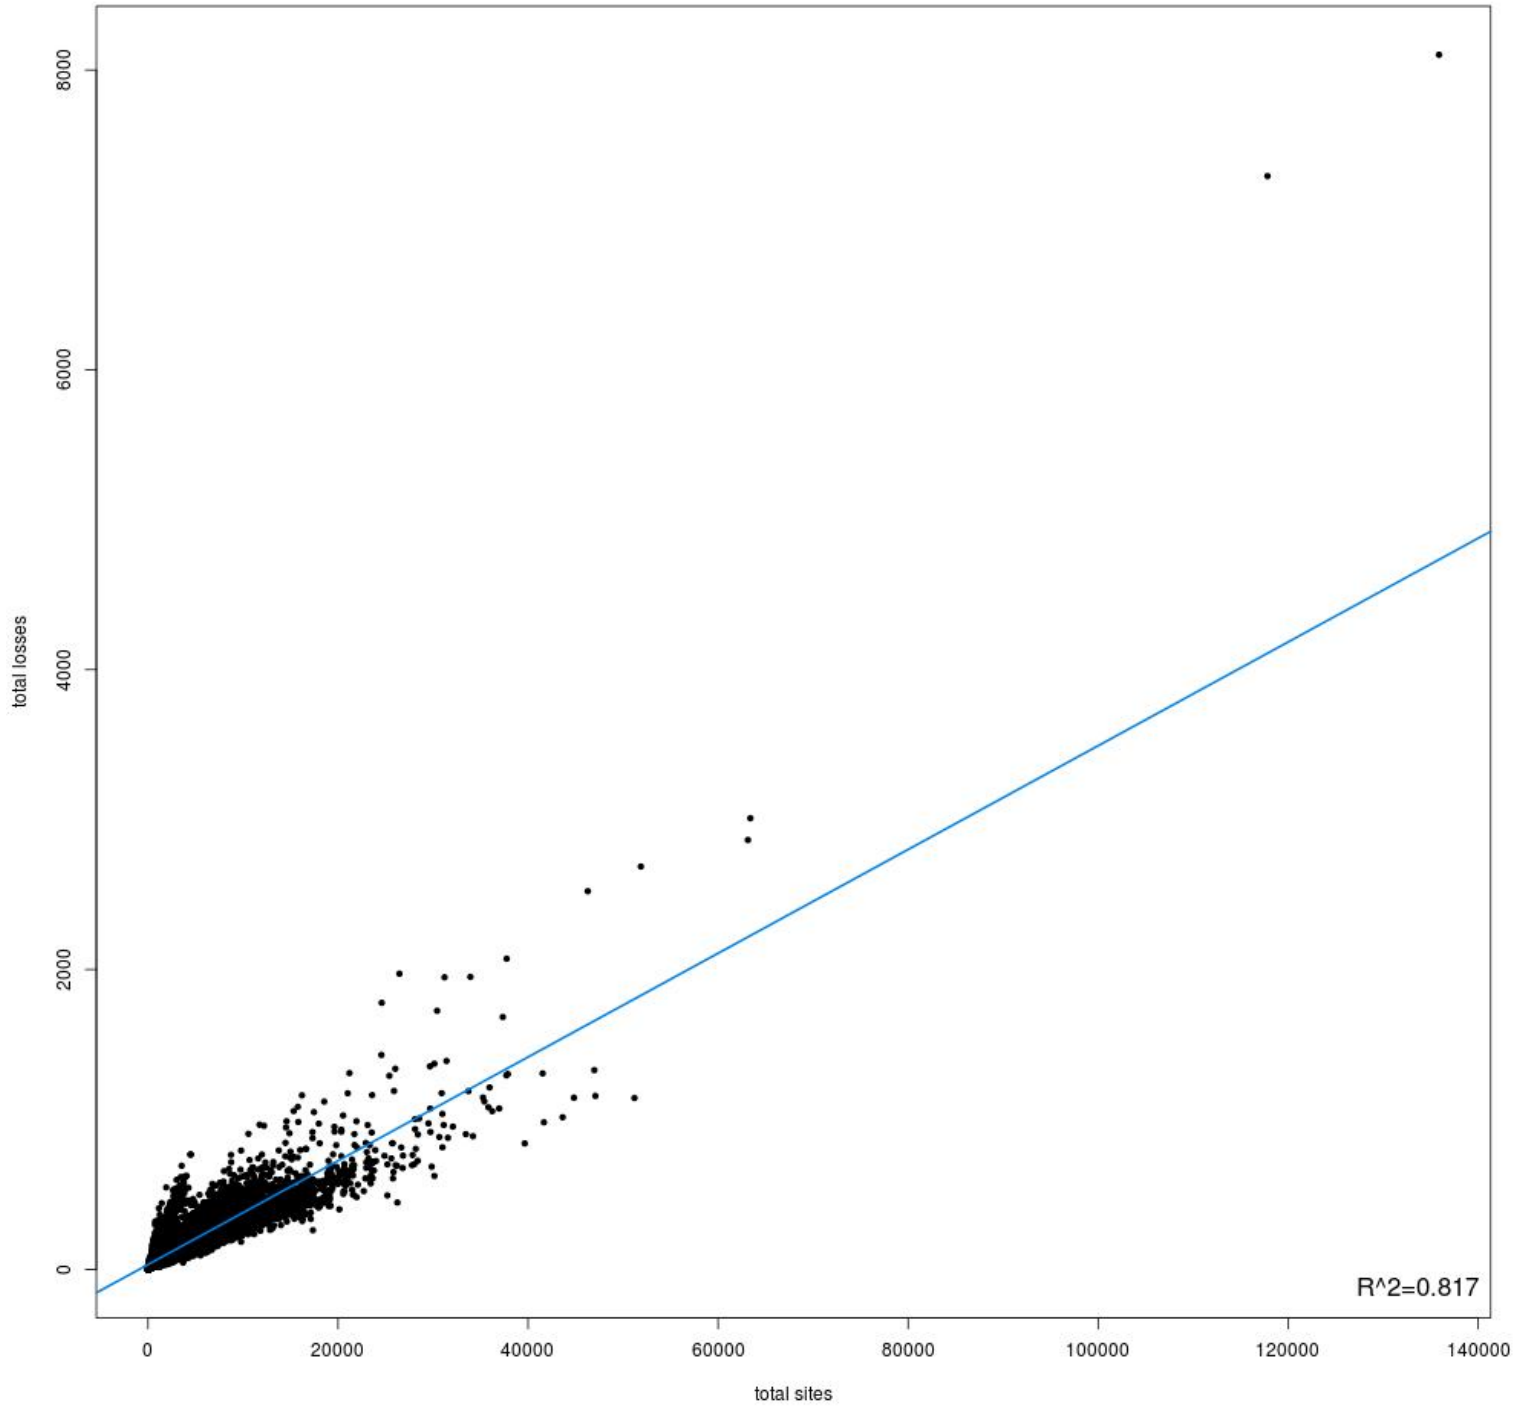

Supplemental Figure 1B: Inferred loss rates correlate with total number of binding sites

8mers that occur frequently have a higher likelihood that one or more 8mers will have a loss event occur. It is therefore necessary to normalize turnover rates by dividing the number of inferred losses by number of total observed sites
